# Supplementary material for: Comparative phylogenomic analyses and co-expression gene network reveal insights in flowering time and aborted meiosis in woody bamboo, Bambusa oldhamii ‘Xia Zao’ ZSX
Source: Front Plant Sci. 2022 Nov 9;13:1023240. doi: 10.3389/fpls.2022.1023240 (PMC9681927; doi:10.3389/fpls.2022.1023240)
Supplement: Supplementary file 12 [file Table_2.xlsx]

## Sheet: Sheet1
Additional file 3: List of known function of pollen developmental and meiotic genes
	Gene name	Arabidopsis gene ID	Rice gene ID	Best hit in Bambusa	NF_Cb	F_Cb	F_ShU	F_ShA	F_Fl1	F_Fl2	F_Fl3
Polarity rearrangment	/	AT2G33860.1	LOC_Os05g48870.1	comp148341_c0_seq6	7.43	7.83	8.38	8.12	8.24	7.65	7.34
Polarity rearrangment	/	AT2G34710.1	LOC_Os12g41860.1	comp150024_c0_seq4	8.12	8.77	9.01	8.89	8.97	8.4	8.03
Anther differentiation	BES1	AT1G19350.3	LOC_Os07g39220.1	comp134596_c0_seq2	6.93	7.83	7.86	7.77	8.07	7.34	7.03
Anther differentiation	SERK2	AT1G34210.1	LOC_Os08g07760.1	comp149057_c0_seq4	7.3	7.91	7.66	7.32	7.94	7.49	7.28
Anther differentiation	SERK1	AT1G71830.1	LOC_Os08g07760.1	comp149057_c0_seq4	7.3	7.91	7.66	7.32	7.94	7.49	7.28
Anther differentiation	BLH4	AT2G23760.1	LOC_Os10g39030.1	comp148225_c0_seq1	9.49	9.31	8.97	8.53	7.84	8.11	8.32
Anther differentiation	ERECTA	AT2G26330.1	LOC_Os06g10230.1	comp149534_c0_seq1	4.18	6.81	7.73	8	8.35	7.45	6.78
Anther differentiation	ROXY1	AT3G02000.1	LOC_Os02g30850.1	comp138721_c0_seq9	1.77	4.88	4.72	4.33	5.26	3.39	2.37
Anther differentiation	MYB110	AT3G29020.2	LOC_Os01g16810.1	comp132466_c2_seq10	5.02	6.22	4.52	4.37	4.86	4.66	3.72
Anther differentiation	BAM2	AT3G49670.1	LOC_Os03g56270.1	comp149678_c0_seq1	5.16	6.5	6.09	5.8	7.16	6.3	5.67
Anther differentiation	BAM3	AT4G20270.1	LOC_Os07g04190.1	comp150368_c1_seq1	3.3	5.18	5.14	5.17	5.99	5.3	4.3
Anther differentiation	ATML1	AT4G21750.1	LOC_Os08g08820.2	comp150407_c2_seq1	4.43	5.91	5.7	4.93	7.63	6.84	6.3
Anther differentiation	TPD1	AT4G24972.1	LOC_Os12g28750.1	comp122342_c0_seq2	-0.71	-0.06	-1.04	-1.11	2.06	2.12	1.11
Anther differentiation	BLH2	AT4G36870.1	LOC_Os03g52239.1	comp148225_c0_seq1	9.49	9.31	8.97	8.53	7.84	8.11	8.32
Anther differentiation	ANT	AT4G37750.1	LOC_Os03g56050.1	comp146802_c0_seq9	3.67	4.99	3.33	3.23	4.76	2.53	1.25
Anther differentiation	BRI1	AT4G39400.1	LOC_Os01g52050.1	comp149746_c0_seq1	6.04	6.31	6.33	6.03	6.3	5.78	5.55
Anther differentiation	EMS1/EXS	AT5G07280.1	LOC_Os01g68870.2	comp149363_c0_seq1	4.34	5.43	4.87	4.29	6.68	5.57	4.88
Anther differentiation	ROXY2	AT5G14070.1	LOC_Os02g30850.1	comp138721_c0_seq9	1.77	4.88	4.72	4.33	5.26	3.39	2.37
MMC & tapetum differentiation	/	/	LOC_Os02g28970.1	comp133012_c1_seq1	-1.64	-0.7	2.55	0.02	5.5	6.67	4.4
MMC & tapetum differentiation	/	AT1G34640.1	LOC_Os07g43010.1	comp132200_c0_seq13	4.23	5.3	5.15	4.75	4.67	5.84	6.12
MMC & tapetum differentiation	ASSH2	AT1G77300.1	LOC_Os02g34850.1	comp150471_c0_seq2	4.61	5.22	5.75	5.84	5.91	6.09	5.83
MMC & tapetum differentiation	AMS	AT2G16910.1	LOC_Os02g02820.1	comp144861_c0_seq7	1.77	2.56	3.8	3.62	6	4.9	4.15
MMC & tapetum differentiation	TDF1/MYB35	AT3G28470.1	LOC_Os03g18480.1	comp145741_c2_seq16	4.29	5.37	6.19	5.94	5.89	6.59	6.84
MMC & tapetum differentiation	DYT1	AT4G21330.1	LOC_Os02g02820.1	comp141693_c0_seq13	-1.57	0.48	1.28	1.86	3.88	5.27	5.17
MMC & tapetum differentiation	RLK3	AT4G23190.1	LOC_Os07g35580.1	comp148633_c0_seq1	4.26	5.43	4.45	4.14	3.35	3.69	3.93
MMC & tapetum differentiation	ASHR3	AT4G30860.1	LOC_Os02g39800.1	comp128150_c0_seq4	2.09	3.29	4.62	4.76	5.38	5.02	4.46
MMC & tapetum differentiation	RLK1	AT5G60900.1	LOC_Os04g39930.1	comp135565_c0_seq2	3.7	2.89	2.87	3.12	3.03	2.9	2.56
Tapetum development	AtbHLH089	AT1G06170.1	LOC_Os04g51070.1	comp146889_c0_seq3	4.72	5.29	6.06	5.44	5.7	7.29	7.09
Tapetum development	AtbHLH010	AT2G31220.1	LOC_Os04g51070.1	comp149968_c1_seq2	3.22	3.87	3.21	2.89	2.54	7.5	6.65
Tapetum development	/	AT2G44290.1	LOC_Os11g37280.1	comp138361_c0_seq1	2.05	2.6	1.53	2.35	1.67	13.62	13.31
Tapetum development	AtMYB65	AT3G11440.1	LOC_Os01g59660.1	comp145741_c2_seq16	4.29	5.37	6.19	5.94	5.89	6.59	6.84
Tapetum development	/	AT4G18960.1	LOC_Os01g10504.1	comp136952_c1_seq1	6.07	3.6	5.65	4.23	7.24	9.55	10.33
Tapetum development	AtMYB33	AT5G06100.2	LOC_Os01g59660.1	comp145741_c2_seq16	4.29	5.37	6.19	5.94	5.89	6.59	6.84
Tapetum development	MS1	AT5G22260.1	LOC_Os09g27620.1	comp128113_c0_seq3	-1.85	-1.8	-1.71	-2	-1.03	6.11	4.21
Tapetum development	MYB80/103	AT5G56110.1	LOC_Os04g39470.1	comp126598_c0_seq1	1.61	1.18	2	1.86	0.67	6.38	4.48
Tapetum development	MYB99	AT5G62320.1	LOC_Os09g36250.1	comp140200_c0_seq4	3.96	5.59	7.33	6.67	6.38	6.27	6.33
Pollen wall development	CYP703A2	AT1G01280.1	LOC_Os08g03682.1	comp136500_c0_seq13	-0.03	-0.05	-0.55	-0.08	0.03	8.47	7
Pollen wall development	LAP6	AT1G02050.1	LOC_Os10g34360.1	comp143924_c0_seq42	3.28	3.84	4.34	1.97	5.89	9.61	9.9
Pollen wall development	CER1	AT1G02205.3	LOC_Os10g33250.1	comp132064_c1_seq5	7.32	7.47	7.17	6.86	7.51	7.13	7.02
Pollen wall development	GPAT1	AT1G06520.1	LOC_Os01g44069.1	comp144763_c1_seq1	1.19	3.01	4.86	4.62	5.42	4.24	4.27
Pollen wall development	ACOS5	AT1G62940.1	LOC_Os04g24530.1	comp133501_c0_seq1	-0.1	0.15	-0.38	-0.08	0.65	11.18	9.32
Pollen wall development	TKPR2	AT1G68540.1	LOC_Os01g03670.1	comp132580_c0_seq6	0.33	0.51	0.53	-0.4	0.54	9.08	7.19
Pollen wall development	CYP704B1	AT1G69500.1	LOC_Os03g07250.1	comp135224_c0_seq3	0.37	0.58	-0.55	0.6	0.47	11.47	10.11
Pollen wall development	ARF17	AT1G77850.1	LOC_Os06g47150.1	comp144270_c0_seq14	4.41	4.68	4.33	4.48	5.27	6.08	6.53
Pollen wall development	CalS5	AT2G13680.1	LOC_Os06g08380.1	comp150657_c0_seq1	4	5.12	5.82	5.83	5.44	4.94	4.32
Pollen wall development	FLA3	AT2G24450.1	LOC_Os02g26320.1	comp120779_c0_seq2	-2	-2	-2	-2	-2	-2	4.68
Pollen wall development	GPAT6	AT2G38110.1	LOC_Os01g63580.1	comp147579_c0_seq1	4.08	5.87	7.08	6.17	7.7	8.83	8.69
Pollen wall development	RGP1	AT3G02230.1	LOC_Os03g40270.1	comp143236_c1_seq12	7.98	9.2	10.24	10.27	9.68	10.21	10.18
Pollen wall development	DEX1	AT3G09090.1	LOC_Os03g61050.1	comp148152_c0_seq10	6.2	6.06	6.28	6.41	6.71	6.68	6.56
Pollen wall development	MS2	AT3G11980.1	LOC_Os03g07140.1	comp141642_c1_seq20	0.66	1.24	0.92	1.79	1.15	10.38	8.7
Pollen wall development	ABCG26	AT3G13220.1	LOC_Os06g40550.1	comp123159_c0_seq8	-0.72	-0.51	-1.56	-1.33	-0.86	9.44	7.57
Pollen wall development	NPU1	AT3G51610.1	LOC_Os05g07640.1	comp148390_c1_seq25	6.02	6.32	6.57	6.46	6.54	6.47	6.68
Pollen wall development	A6	AT4G14080.1	LOC_Os09g32550.1	comp148579_c0_seq1	4.38	5.34	5.77	5.87	5.99	5.24	4.92
Pollen wall development	Inp1	AT4G22600.1	LOC_Os02g44250.1	comp119867_c0_seq4	0.98	1.85	-0.15	0.36	1.02	1.46	0.63
Pollen wall development	CESA1	AT4G32410.1	LOC_Os05g08370.1	comp149739_c0_seq3	8.04	8.2	9.8	9.62	8.71	9.01	8.91
Pollen wall development	LAP5	AT4G34850.1	LOC_Os07g22850.1	comp149638_c0_seq2	1.72	1.5	1.07	1.04	1.55	11.47	10.02
Pollen wall development	TKPR1	AT4G35420.1	LOC_Os08g40440.1	comp125940_c0_seq17	-0.42	0.44	-0.27	-1.24	-0.43	10.08	8.3
Pollen wall development	CESA3	AT5G05170.1	LOC_Os07g10770.1	comp150161_c0_seq2	6.88	7.06	8.84	9.3	7.53	8.42	8.71
Pollen wall development	NEF1	AT5G13390.1	LOC_Os11g32470.1	comp147917_c0_seq12	5.44	5.66	5.92	5.93	5.94	5.97	5.9
Pollen wall development	RGP2	AT5G15650.1	LOC_Os03g40270.1	comp143236_c1_seq12	7.98	9.2	10.24	10.27	9.68	10.21	10.18
Pollen wall development	RPG1	AT5G40260.1	LOC_Os01g42110.1	comp134079_c1_seq27	2.08	1.85	1.33	1.61	3.15	7.42	9.08
Pollen wall development	AtUSP	AT5G52560.1	LOC_Os06g48760.1	comp145501_c0_seq5	5.71	6.13	6.72	6.67	6.57	6.72	6.79
Pollen wall development	FLP1	AT5G57800.1	LOC_Os09g25850.1	comp150525_c1_seq1	5.69	6.26	6.16	5.67	6.49	8.58	9.73
Meiosis initiation	MEI1	AT1G77320.1	LOC_Os11g08660.1	comp134107_c1_seq21	3.55	3.53	3.61	3.67	4.96	4.24	3.81
Meiosis initiation	SMC3, TTN7	AT2G27170.1	LOC_Os02g04050.1	comp148591_c0_seq29	7.47	7.31	7.07	6.96	7.64	7.5	7.16
Meiosis initiation	MEL1	AT2G27880.1	LOC_Os03g58600.1	comp144848_c0_seq12	-0.79	-0.58	0.05	-0.35	5.26	6.51	6.99
Meiosis initiation	AML2, MEI2-LIKE 2, ML2	AT2G42890.1	LOC_Os02g48790.1	comp150272_c1_seq1	7.7	7.94	7.36	6.88	7.46	7.17	7.33
Meiosis initiation	ANP3, MAPKKK12, NP3	AT3G06030.1	LOC_Os09g21510.1	comp150470_c1_seq12	5.96	5.96	5.92	5.79	5.72	6.1	6
Meiosis initiation	CDC45	AT3G25100.1	LOC_Os11g03430.1	comp146393_c0_seq3	1.02	1.4	3.74	3.96	4.62	3.91	2.69
Meiosis initiation	/	AT3G28880.1	LOC_Os12g38460.1	comp133997_c1_seq1	-1.15	-0.18	-0.22	-0.59	4.98	4.26	4.16
Meiosis initiation	ATCAP-E1, ATSMC4, SMC2, TTN3	AT3G47460.1	LOC_Os01g67740.1	comp149497_c1_seq1	3.8	3.85	4.93	5.14	5.98	5.01	4.14
Meiosis initiation	TTN8	AT3G54670.3	LOC_Os12g44390.1	comp138845_c1_seq7	6.76	6.58	6.03	6.12	6.62	6.45	6.12
Meiosis initiation	ATRAD18, MIM, SMC6B	AT5G07660.1	LOC_Os09g03370.1	comp144480_c0_seq17	4.99	5.35	4.64	4.58	5.62	5.32	5.13
Meiosis initiation	SMC5	AT5G15920.1	LOC_Os05g51790.1	comp140527_c0_seq27	4.63	4.66	4.53	4.32	5.1	4.81	4.56
Meiosis initiation	AGO9	AT5G21150.1	LOC_Os01g16870.3	comp149328_c0_seq1	9.13	9.01	8.09	7.83	9.2	8.66	8.39
Meiosis initiation	SMC3	AT5G48600.2	LOC_Os05g41750.1	comp148778_c0_seq3	3.89	4.05	5.32	5.39	6.35	5.35	4.55
Meiosis initiation	XRI1	AT5G48720.2	LOC_Os01g68930.1	comp142801_c0_seq23	7.43	7.85	7.69	7.25	7.74	7.34	7.38
Meiosis initiation	DYAD, SWI1	AT5G51330.1	LOC_Os03g44760.1	comp147294_c0_seq7	2.88	2.74	1.69	1.55	3.94	3.38	2.31
Meiosis initiation	/	AT5G51330.1	LOC_Os03g44760.1	comp147294_c0_seq7	2.88	2.74	1.69	1.55	3.94	3.38	2.31
Meiosis initiation	AML1, ML1	AT5G61960.1	LOC_Os02g31290.1	comp150309_c0_seq4	7.02	7.45	7.73	7.41	7.79	7.64	7.72
Formation of meiotic DNA double-strand break (DSB)	PAIR1/PRD3	AT1G01690.1	LOC_Os03g01590.1	comp149638_c0_seq2	1.72	1.5	1.07	1.04	1.55	11.47	10.02
Formation of meiotic DNA double-strand break (DSB)	DFO	AT1G07060.1	LOC_Os12g01540.1	comp123852_c0_seq14	-0.72	1.39	2.59	3.22	2.89	1.94	1.38
Formation of meiotic DNA double-strand break (DSB)	SPO11-2	AT1G63990.1	LOC_Os08g06050.1	comp143415_c0_seq104	5.21	5.19	4.4	4.07	4.93	4.27	4.28
Formation of meiotic DNA double-strand break (DSB)	SPO11-1	AT3G13170.1	LOC_Os03g54091.1	comp150665_c0_seq1	7.89	7.87	7.63	8.01	7.95	7.78	8.04
Formation of meiotic DNA double-strand break (DSB)	/	AT3G13170.1	LOC_Os03g54091.1	comp131785_c0_seq43	5.4	5.34	4.24	3.7	4.81	4.47	4.38
Formation of meiotic DNA double-strand break (DSB)	PRD1	AT4G14180.1	LOC_Os04g28020.1	comp134370_c0_seq74	3.48	3.56	3	2.69	3.5	2.94	2.86
Formation of meiotic DNA double-strand break (DSB)	CRC1/PCH2	AT4G24710.1	LOC_Os04g40290.1	comp152615_c0_seq1	-1.77	-2	-2	-2	-1.75	-1.36	-2
Formation of meiotic DNA double-strand break (DSB)	/	AT5G02820.1	LOC_Os12g42760.1	comp150665_c0_seq1	7.89	7.87	7.63	8.01	7.95	7.78	8.04
Formation of meiotic DNA double-strand break (DSB)	PRD2	AT5G57880.1	LOC_Os08g44180.1	comp132595_c0_seq17	2.27	3.42	3.43	3.3	4.46	3.91	4.14
Synaptonemal complex	ZYP1A	AT1G22260.1	LOC_Os04g37960.1	comp148663_c0_seq11	1.2	1.42	2.47	2.51	3.65	4.19	3.74
Synaptonemal complex	ZYP1B	AT1G22275.1	LOC_Os04g37960.1	comp148663_c0_seq11	1.2	1.42	2.47	2.51	3.65	4.19	3.74
Synaptonemal complex	ASY1	AT1G67370.1	LOC_Os09g32930.1	comp141479_c0_seq10	1.78	1.79	2.24	1.96	2.96	4.56	3.97
Synaptonemal complex	ASY3	AT2G46980.2	LOC_Os10g26560.1	comp149100_c0_seq2	1.27	1.43	2.91	2.89	3.51	3.26	3.01
Crossover formation	AXR1	AT1G05180.1	LOC_Os03g60550.1	comp149968_c1_seq2	3.22	3.87	3.21	2.89	2.54	7.5	6.65
Crossover formation	RECQ4A	AT1G10930.1	LOC_Os04g35420.1	comp142770_c0_seq29	1.71	2.7	3.74	3.76	4.8	4.07	3.53
Crossover formation	PSS1	AT1G15110.2	LOC_Os01g02890.1	comp148693_c0_seq1	4.57	4.12	3.5	3.42	4.07	3.62	3.89
Crossover formation	PTD	AT1G21980.1	LOC_Os03g49800.1	comp149740_c0_seq2	5.6	6.33	6.31	6.27	6.56	6.31	6.03
Crossover formation	FANCM	AT1G35530.2	LOC_Os11g07870.1	comp130403_c0_seq36	2.16	2.66	1.45	1.52	3.02	2.49	2.17
Crossover formation	HEI10	AT1G53490.1	LOC_Os02g13810.1	comp147870_c1_seq31	4	4.3	3.38	3.1	4.11	3.89	3.89
Crossover formation	RECQ4B	AT1G60930.1	LOC_Os04g35420.1	comp142770_c0_seq29	1.71	2.7	3.74	3.76	4.8	4.07	3.53
Crossover formation	MHF2	AT1G78790.1	LOC_Os04g40550.1	comp129599_c0_seq11	2.06	1.52	3.95	4.32	4.55	4.74	4.58
Crossover formation	Ph1	AT2G29700.1	LOC_Os01g63800.1	comp132477_c0_seq5	6.46	6.99	7.11	6.97	6.7	6.72	7.04
Crossover formation	RBR	AT3G12280.1	LOC_Os08g42600.1	comp150010_c0_seq1	6.27	6.44	6.52	6.15	6.85	6.56	6.41
Crossover formation	MSH5	AT3G20475.1	LOC_Os05g41880.1	comp144645_c0_seq68	1.51	2.83	2.34	1.58	2.86	2.94	2.88
Crossover formation	MER3/RCK	AT3G27730.1	LOC_Os02g40450.1	comp147873_c0_seq168	0.19	-0.15	1.24	1.58	1.74	2.37	2.29
Crossover formation	ARP6	AT3G33520.1	LOC_Os01g16414.4	comp148698_c1_seq7	5.49	5.94	5.26	5.13	5.79	5.27	5.07
Crossover formation	MLH1	AT4G09140.1	LOC_Os01g72880.1	comp134904_c1_seq1	4.24	4.59	3.85	3.42	4.6	4.26	3.94
Crossover formation	MSH4	AT4G17380.1	LOC_Os07g30240.1	comp147871_c0_seq15	1.14	1.56	2.45	2.27	2.16	3.14	2.88
Crossover formation	MUS81	AT4G30870.1	LOC_Os01g71960.1	comp134912_c0_seq79	3.5	3.96	3.04	2.67	4.01	3.48	3.34
Crossover formation	MLH3	AT4G35520.1	LOC_Os09g37930.1	comp148942_c0_seq11	5.65	5.47	5.21	5.15	5.45	5.32	5.1
Crossover formation	AtRFC1, RFC1	AT5G22010.1	LOC_Os11g36390.1	comp150182_c0_seq3	6.66	7.07	6.94	6.87	7.49	7.22	6.93
Crossover formation	ZIP4	AT5G48390.1	LOC_Os01g66690.1	comp145772_c0_seq11	-0.66	-0.43	-0.42	-1.03	1.13	2.47	1.31
Crossover formation	MHF1	AT5G50930.1	LOC_Os04g32600.1	comp129208_c0_seq7	3.62	4.05	4.05	3.64	4.16	3.57	3.64
Crossover formation	SHOC1	AT5G52290.1	LOC_Os02g42910.1	comp144500_c0_seq3	-0.03	0.7	1.15	1.23	2.15	1.41	1.13
Crossover formation	CDKG1	AT5G63370.1	LOC_Os04g41100.4	comp150387_c1_seq12	7.42	7.4	7.18	6.91	7.38	7.22	7.07
Crossover formation	BLAP75/RMI1	AT5G63540.2	LOC_Os04g32090.1	comp142046_c0_seq8	2.57	2.85	2.89	2.77	3.72	3.07	2.65
Crossover formation	Top3A	AT5G63920.1	LOC_Os03g06900.1	comp137434_c0_seq6	-0.77	0.42	2.17	1.83	2.93	2.39	1.54
DNA strand invasion or exchange	AHP2/HOP2	AT1G13330.1	LOC_Os03g50220.1	comp149107_c0_seq5	4.42	4.73	4.96	4.85	5.8	4.93	4.53
DNA strand invasion or exchange	SDS	AT1G14750.1	LOC_Os03g12414.2	comp141699_c0_seq2	4.08	4.02	3.2	2.69	2.98	3.58	3.22
DNA strand invasion or exchange	/	AT3G22880.1	LOC_Os11g04954.1	comp143415_c0_seq41	0.82	2.03	4.24	3.79	4.65	5.73	4.86
DNA strand invasion or exchange	/	AT3G22880.1	LOC_Os12g04980.1	comp143415_c0_seq41	0.82	2.03	4.24	3.79	4.65	5.73	4.86
DNA strand invasion or exchange	XRCC2	AT5G64520.1	LOC_Os01g64990.1	comp140502_c0_seq24	4.11	4.21	3.46	3.64	4.3	4.19	3.96
Processing of meiotic DSB	RAD51D	AT1G07745.1	LOC_Os09g01680.1	comp149102_c0_seq15	3.27	4.37	3.32	2.91	6.15	5.91	4.92
Processing of meiotic DSB	RPA1A	AT2G06510.1	LOC_Os02g53680.1	comp149728_c0_seq2	6.7	6.9	6.42	6.18	6.52	6.72	6.75
Processing of meiotic DSB	/	AT2G24490.1	LOC_Os06g47830.1	comp133468_c0_seq105	0.46	0.54	1.06	1.01	2.15	2.61	2.58
Processing of meiotic DSB	RAD51B	AT2G28560.1	LOC_Os05g03050.1	comp140621_c0_seq48	2.8	2.97	3.05	3.05	3.38	3.54	3.56
Processing of meiotic DSB	RAD50	AT2G31970.1	LOC_Os02g29464.1	comp144360_c0_seq56	4.42	4.88	4.38	4.27	4.98	4.77	4.52
Processing of meiotic DSB	RAD51C	AT2G45280.2	LOC_Os01g39630.1	comp124896_c0_seq19	3.1	3.57	3.08	3.01	3.94	3.43	3.27
Processing of meiotic DSB	NBS1	AT3G02680.1	LOC_Os10g34580.1	comp141546_c0_seq23	5.54	5.44	4.44	4.39	5.25	4.73	4.37
Processing of meiotic DSB	MCM8	AT3G09660.1	LOC_Os05g38850.1	comp128136_c0_seq8	3.59	3.81	3.32	3.4	3.83	3.4	2.87
Processing of meiotic DSB	ARLIM15, ATDMC1, DMC1	AT3G22880.1	LOC_Os11g04954.1	comp143415_c0_seq41	0.82	2.03	4.24	3.79	4.65	5.73	4.86
Processing of meiotic DSB	AtGR1	AT3G24170.1	LOC_Os02g56850.1	comp145515_c0_seq38	5.29	5.33	5.68	6.03	6.13	6.05	5.79
Processing of meiotic DSB	ATM	AT3G48190.1	LOC_Os01g01689.1	comp149902_c0_seq29	3.98	4.14	3.64	3.77	4.52	4.32	4.07
Processing of meiotic DSB	ATCOM1, ATGR1, COM1, GR1	AT3G52115.1	LOC_Os06g41050.1	comp132842_c0_seq3	0.74	1.98	2.81	2.98	3.82	3.3	2.97
Processing of meiotic DSB	BRCA2(IV)/BRC2A	AT4G00020.2	LOC_Os01g07110.1	comp140574_c0_seq102	2.99	3.57	3.51	3.64	4.23	3.7	3.48
Processing of meiotic DSB	MND1	AT4G29170.1	LOC_Os09g10850.1	comp122478_c0_seq1	5.06	5.31	5.42	5.31	6.12	5.97	5.77
Processing of meiotic DSB	BRCA2(V)/BRCA2B	AT5G01630.1	LOC_Os01g07110.1	comp140574_c0_seq102	2.99	3.57	3.51	3.64	4.23	3.7	3.48
Processing of meiotic DSB	RAD51	AT5G20850.1	LOC_Os11g40150.1	comp143374_c0_seq5	5.44	5.65	5.89	5.74	6.84	6.03	5.88
Processing of meiotic DSB	/	AT5G20850.1	LOC_Os12g31370.1	comp143374_c0_seq5	5.44	5.65	5.89	5.74	6.84	6.03	5.88
Processing of meiotic DSB	ATR	AT5G40820.1	LOC_Os06g50910.3	comp138307_c0_seq1	3.63	3.16	2.49	2.85	3.86	3.35	3.04
Processing of meiotic DSB	RPA1C	AT5G45400.1	LOC_Os05g02040.1	comp150339_c0_seq2	5.41	5.78	4.43	4.44	5.43	4.68	4.39
Processing of meiotic DSB	ATMRE11, MRE11	AT5G54260.1	LOC_Os04g54340.1	comp140196_c0_seq45	4.84	5.13	5.15	4.97	5.81	5.47	5.15
Processing of meiotic DSB	/	AT5G54260.1	LOC_Os04g54340.1	comp140196_c0_seq45	4.84	5.13	5.15	4.97	5.81	5.47	5.15
Processing of meiotic DSB	XRCC3	AT5G57450.1	LOC_Os02g35450.1	comp121039_c0_seq1	2.46	2.14	2.75	2.35	2.85	2.67	2.24
Chromosome segregation	CENH3, HTR12	AT1G01370.1	LOC_Os05g41080.1	comp138864_c0_seq16	4.25	4.91	6.24	6.35	7.13	5.96	5.35
Chromosome segregation	AML3, ML3	AT1G29400.1	LOC_Os02g48790.1	comp150272_c1_seq1	7.7	7.94	7.36	6.88	7.46	7.17	7.33
Chromosome segregation	ATPS1, PS1	AT1G34355.1	LOC_Os11g07050.1	comp149720_c0_seq5	3.15	3.76	4.45	4.54	5.19	4.15	4.01
Chromosome segregation	ATSCC3, SCC3	AT2G47980.1	LOC_Os05g09620.1	comp131928_c2_seq2	5.71	5.49	5.38	5.4	6.38	5.96	5.37
Chromosome segregation	MAD2	AT3G25980.1	LOC_Os04g40940.1	comp134979_c0_seq8	3.91	3.9	6.38	6.63	6.92	5.9	5.55
Chromosome segregation	NULL	AT4G11080.1	LOC_Os02g15810.1	comp127744_c0_seq36	6.76	7.1	7.56	7.44	8.19	7.33	7.02
Sister chromatid cohesion	JASON	AT1G06660.1	LOC_Os03g56590.1	comp134064_c2_seq13	3.95	4.53	4.09	4.02	4.79	4.47	4.31
Sister chromatid cohesion	PS1	AT1G08700.1	LOC_Os01g16930.1	comp139961_c0_seq2	1.14	2.22	1.54	1.47	3.24	2.88	2.88
Sister chromatid cohesion	ASK1	AT1G10940.2	LOC_Os04g35240.1	comp148812_c1_seq22	7.08	7.16	7.48	7.07	6.84	6.77	6.75
Sister chromatid cohesion	MMD/DUET	AT1G66170.1	LOC_Os03g50780.1	comp128113_c0_seq3	-1.85	-1.8	-1.71	-2	-1.03	6.11	4.21
Sister chromatid cohesion	CYCA1,/CYCA1;2/DYP/TAM	AT1G77390.1	LOC_Os01g13260.1	comp148979_c0_seq9	3.9	4.67	5.05	5.04	5.73	4.87	4.4
Sister chromatid cohesion	/	AT2G20635.1	LOC_Os07g32480.1	comp131929_c0_seq13	0	1.89	4.36	4.45	5.43	4.1	3.67
Sister chromatid cohesion	SGO1	AT3G10440.1	LOC_Os10g31930.1	comp135803_c0_seq20	5.24	5.62	5.27	5.25	5.34	5.03	5.22
Sister chromatid cohesion	TES/NACK2/STD	AT3G43210.1	LOC_Os01g33040.1	comp148105_c0_seq1	-1.14	1.91	5.43	5.77	5.94	4.82	4.32
Sister chromatid cohesion	OSD1/UVI4L/GIG1	AT3G57860.1	LOC_Os02g37850.2	comp149522_c0_seq15	4.29	4.41	4.92	5.11	5.12	5.21	5.21
Sister chromatid cohesion	SYN3/RAD21.2	AT3G59550.1	LOC_Os01g67250.1	comp149335_c0_seq4	4.82	4.93	5.38	5.2	5.56	5.06	4.92
Sister chromatid cohesion	MPK4	AT4G01370.1	LOC_Os08g06060.1	comp149335_c0_seq11	6.42	6.47	6.56	6.28	6.54	6.32	6.29
Sister chromatid cohesion	MS5/TDM1	AT4G20900.1	LOC_Os09g36740.1	comp143511_c0_seq4	-0.4	3.79	7.02	7.3	7.73	6.23	5.57
Sister chromatid cohesion	ATK1/KATA/KIN14a	AT4G21270.1	LOC_Os04g53760.1	comp149451_c0_seq6	5.73	5.69	7.57	7.45	7.2	7.12	7.29
Sister chromatid cohesion	ESP	AT4G22970.1	LOC_Os02g53120.1	comp144140_c0_seq5	-0.89	0.76	2.69	3.02	4.01	3.19	2.31
Sister chromatid cohesion	SGO2	AT5G04320.2	LOC_Os02g55570.1	comp135882_c0_seq42	1.98	3.45	5.72	5.91	6.32	5.07	4.45
Sister chromatid cohesion	SYN1/DIF1/REC8	AT5G05490.1	LOC_Os05g50410.1	comp120863_c0_seq62	2.32	2.78	2.58	2.33	3.13	3.11	2.87
Sister chromatid cohesion	SCC2/EMB2773	AT5G15540.1	LOC_Os07g01940.1	comp150457_c0_seq2	6.22	6.36	5.96	5.83	6.57	6.39	6.21
Sister chromatid cohesion	SMG7	AT5G19400.1	LOC_Os08g21350.1	comp149898_c0_seq4	7.12	7.59	6.56	6.34	6.96	6.74	6.71
Unclassification	NULL	AT1G07080.1	LOC_Os03g18454.1	comp143122_c0_seq8	5.66	5.76	5.06	4.99	5.69	5.37	5.18
Unclassification	TGA9, bZIP21	AT1G08320.1	LOC_Os01g64020.1	comp139381_c0_seq1	3.99	4.62	4.67	4.47	4.6	4.67	4.66
Unclassification	NULL	AT1G12790.1	LOC_Os05g51060.1	comp126203_c0_seq54	5.02	5.06	4.93	4.48	4.95	4.8	4.73
Unclassification	/	AT1G52530.1	LOC_Os04g44620.1	comp129020_c0_seq10	2.51	1.91	2.52	2.52	3.39	2.94	2.62
Unclassification	NULL	AT1G63770.5	LOC_Os08g44860.1	comp148624_c1_seq6	7.48	7.56	7.93	7.95	8.04	7.99	7.97
Unclassification	EME1A	AT2G21800.2	LOC_Os04g55500.1	comp143732_c0_seq7	2.57	2.47	3.76	3.72	4.72	3.79	3.82
Unclassification	MCC1	AT3G02980.1	LOC_Os02g46700.1	comp146221_c0_seq12	6.57	6.67	6.88	6.68	6.29	6.54	6.41
Unclassification	ATMSH2, MSH2	AT3G18524.1	LOC_Os05g19270.1	comp136640_c0_seq6	4.74	5.11	5.23	5.21	5.84	5.27	4.8
Unclassification	PMS1	AT4G02460.1	LOC_Os02g37920.1	comp149596_c0_seq1	6.6	6.7	5.78	5.47	6.47	5.88	5.64
Unclassification	/	AT4G17380.1	LOC_Os07g30240.1	comp147871_c0_seq15	1.14	1.56	2.45	2.27	2.16	3.14	2.88
Unclassification	AML3, ML3	AT4G18120.1	LOC_Os02g48790.1	comp150272_c1_seq1	7.7	7.94	7.36	6.88	7.46	7.17	7.33
Unclassification	TGA10, bZIP65	AT5G06839.3	LOC_Os09g31390.1	comp150489_c0_seq2	3.79	3.78	3.14	3.88	3.15	4.41	4.81
Unclassification	AML4, MEI2-LIKE 4, ML4	AT5G07290.1	LOC_Os02g31290.1	comp150309_c0_seq4	7.02	7.45	7.73	7.41	7.79	7.64	7.72
Unclassification	ASK2, SKP1B	AT5G42190.1	LOC_Os09g36830.1	comp137184_c0_seq4	-2	-2	-2	-2	-2	5.52	4.44
